# Supplementary material for: Increasing the diversity of nylonases for poly(ester amide) degradation
Source: Royal Society of Chemistry journal article supplement (doi:10.1039/d4gc01662a), 2024-01-01
Supplement: d4gc01662a1.pdf [file d4gc01662a1.pdf]

## Supplementary material

### Increasing the diversity of of nylonases for poly(ester amide) degradation

Jan de Witt<sup>1</sup>, Maïke-Elisa Ostheller<sup>2</sup>, Kenneth Jensen<sup>3</sup>, Christian A.M.R van Slagmaat<sup>4</sup>, Tino Polen<sup>1</sup>, Gunnar Seide<sup>2</sup>, Stephan Thies<sup>1</sup>, Benedikt Wynands<sup>1</sup>, and Nick Wierckx<sup>1\*</sup>

<sup>1</sup> Institute of Bio- and Geosciences IBG-1: Biotechnology, Forschungszentrum Jülich, Jülich, Germany

<sup>2</sup> Aachen-Maastricht Institute for Biobased Materials (AMIBM), Maastricht University, Brightlands Chemelot Campus, Urmonderbaan 22, 6167 RD Geleen, The Netherlands

<sup>3</sup> Novonesis A/S, Biologiens Vej 2, Kgs. Lyngby DK-2800, Denmark

<sup>4</sup> B4Plastics BV, IQ-parklaan 2A, 3650, Dilsen-Stokkem, Belgium

\*Corresponding author:

Nick Wierckx

E-mail: n.wierckx@fz-juelich.de

### Contents

**Table S1. Sequences of NylC<sub>1-6</sub>**

**Figure S1. Position of the novel isolates in the phylogenetic tree based on 16S rRNA**

**Figure S2. Structural alignments of NylC<sub>p2</sub> and NylC<sub>3,4,6</sub>.**

**Table S2 RMSD of structural alignments of NylC<sub>p2</sub> and NylC<sub>1</sub>**

**References**

**Table S1. Sequences of NylC<sub>1-6</sub>.**

| <b>Protein ID</b> | <b>Genbank Accession</b> | <b>Donor organism</b>                    | <b>Sequence</b>                                                                                                                                                                                                                                                                                                                                                                                                     |
|-------------------|--------------------------|------------------------------------------|---------------------------------------------------------------------------------------------------------------------------------------------------------------------------------------------------------------------------------------------------------------------------------------------------------------------------------------------------------------------------------------------------------------------|
| NylC <sub>1</sub> | PP841629                 | <i>Leucobacter chromiirestiens</i> JG 31 | MNPSSHEPHALAEIDSGAVIDPAPRLAGAPVFGGPGNGD<br>FDLVPQRSDGRERLRFDFPGVRIGSAHYAEGPTGATVIH<br>LPAGARTAVDARGGAVGLAGGYDFNHAICLAGGSVYG<br>LEAGAGVSDALLERFENRTGFADLQLVSSAIYDFSARST<br>SVYPDRELGRAAFDFAVEGEFAQGRAGAGMSASSGKVD<br>WERTEITGQGAAFRQIGDVRILAVVVPNPVGVILDRAGR<br>VVRGNYDAATGERRHPVFDYAEFAEHRAAETQSGNTT<br>ISALITNVKMSTVELNQFAKQVHSSMHRGIQPFHTDMDG<br>DTLFAVTTDEIDLPISPGSSRGRLSVNATALGAIASEVMW<br>DALLEAAK             |
| NylC <sub>2</sub> | PP841630                 | <i>Microbacterium oxydans</i>            | MTDIHRLAPVLPAGPRRSNGDYALAPVHGTDGRQVEYD<br>FPGVLLGTAEYAEGPTGATVMSIPAGARTFTDRRGAV<br>GASGLYGYNHAICLAGGSVYGLSAVAGVSEALFERAEH<br>RSGFDQLQLVSGAIYDYSVRENSVFPDTALGKAALQAA<br>RQGVIEVGRVGGASASSGKVDPARVEFTGQGAAFRQV<br>GDVKLVVTVLNPYGVIVDRAGRIIRGNFDATTGERRHP<br>ALDYEEAIGESRLVESMSGNTTITAVITNVQLSDVELKQF<br>GLQVHSSMHRGIQPFHTPLDGDTLFALTTDEVALPEDPG<br>TSRGRLSLNSTAVATLAGETAWDAILCAAG                                     |
| NylC <sub>3</sub> | PP841631                 | <i>Streptomyces</i> 63005                | sp.MTVTDRAGTPARAIPAPSPFGPARTNDDFELTPQSPGQG<br>TVEFDFPGVEVGTAEYAEGPTGTTVVHVPAGARMFIDE<br>RGGAIGLSYGDKQFAHAICLSGGSLYGLGACAGVADEL<br>RSRVDNRVGWNDLKC VSGAIYDFATRDNVVPDAALG<br>RAALRTAEPGRFPVGRAGAGISASVGKIDWTRCEFSGQG<br>AAFRQVGDVKILAAATVVNAVGVVVDRTGTVVRGNHDP<br>ATGTRRLPHLDYEAFAFGDGPPTMQGNTTISVLTNVR<br>LDDRALEQFGRQVHGSMNRGIQPFHTSLDGDTLFLLTTD<br>EVDLPTTPSRIGAHALNAVGLGSIAAEVMWDAILSSAR                          |
| NylC <sub>4</sub> | PP841632                 | <i>Variovorax boronicumulans</i>         | MKNDVKAQDLVPRLWQGPSDGRALSDFPQLKIGIAE<br>YEEGPTGCTVLHVEGGADCEVDVRRGGAPLLGGYTRV<br>DAISLAGGSLYGLEAATGVTSRMLAERDGA VGWGKIAL<br>VSGAIYDFGGRTNSIYDPKALGAAAYRSAQVGTFLPGA<br>RGAGRSAAVGKFAAYPDYEREAGGQGA AFAMVGGTRV<br>FVATVVNALGVIVDRQGRVVRGLRHRRTGVRHHPREVL<br>VPTASATVEAPVTPGNTVATTENTTLTVLVTQPMPLF<br>LRQLGRQVHSSMARAIQPFHTPHDGDILFALSTGTGTAS<br>VDPFVLAEAASDLAWDAVLQAVDF                                              |
| NylC <sub>5</sub> | PP841633                 | <i>Gordonia</i> sp.                      | MTFLARAGNRITDVAGIAVGHHRIDDEVVATGTEPG<br>VGWATGTTVVTVDAGATS AVDVRGGGPGTRETDLLEP<br>GNSVRGANAI VLTGGSAYGLSAADGVMRGLEARGIGLP<br>MDEQGHVPIVPAAVIFDLPVGEWARRPDEEFGALALD<br>AADADFAVGSVGAGAGARAGALKGGVGTASITLADGP<br>ARGLTVGALVVANPVGQVIDPATGLPWGGDDLAAYGL<br>GAPAA GELTRLRELEAKGTVLNTTIGVVATDATLSVPSV<br>RRLAMSGHDGLARAVRPAHSPLDGDTLFAVATGRRTAD<br>PEAAVDIPPGMEPEIAVVAALAEASATVVQRAIVSAVVH<br>ATSVAGIPSYRDVVASAFGWDSF    |
| NylC <sub>6</sub> | PP841634                 | <i>Rhodococcus</i> sp.                   | MIVPGPTDSDLVDVAGLSVGHWQRLDPEVTVGTPEIPGTG<br>AATGCTVVLADPSAVASVDVRGGGPGTRETDLDP SHS<br>VQRVDAVLLTGSAYGLAAADGVMRYLEKNGKIPMG<br>APGAVVPIVPGAVIFDLPVGGQWSARPTADSGCTAAATAC<br>STHLERGSAGAGTGARAGALKGGIGSASVRITDGPAAAG<br>VTVAALMVANPVGSVFDVPTGLPWGVDAARAEELGLS<br>SPSASDLAAARALGDKGTVLNTTIGVVATDAPLSKAAC<br>RRVAVTGHDLGRAIRPAHSPLDGDITIFALSTGTADVTD<br>ALRDSIPSIPAFAAELPILAAVCEAAA VVERAIVDAILSA<br>TSVADIPAYRDVLPVSVFGR |

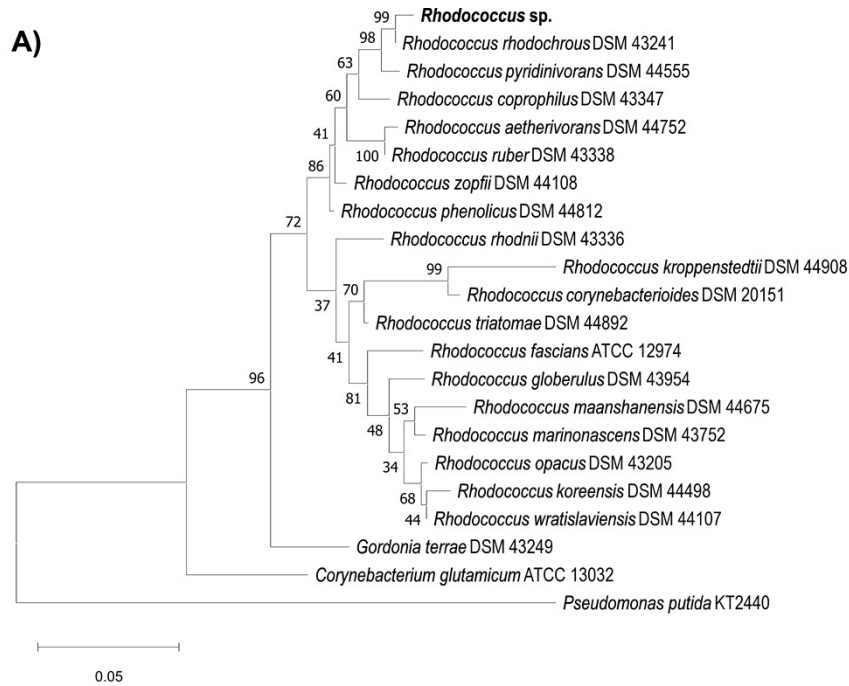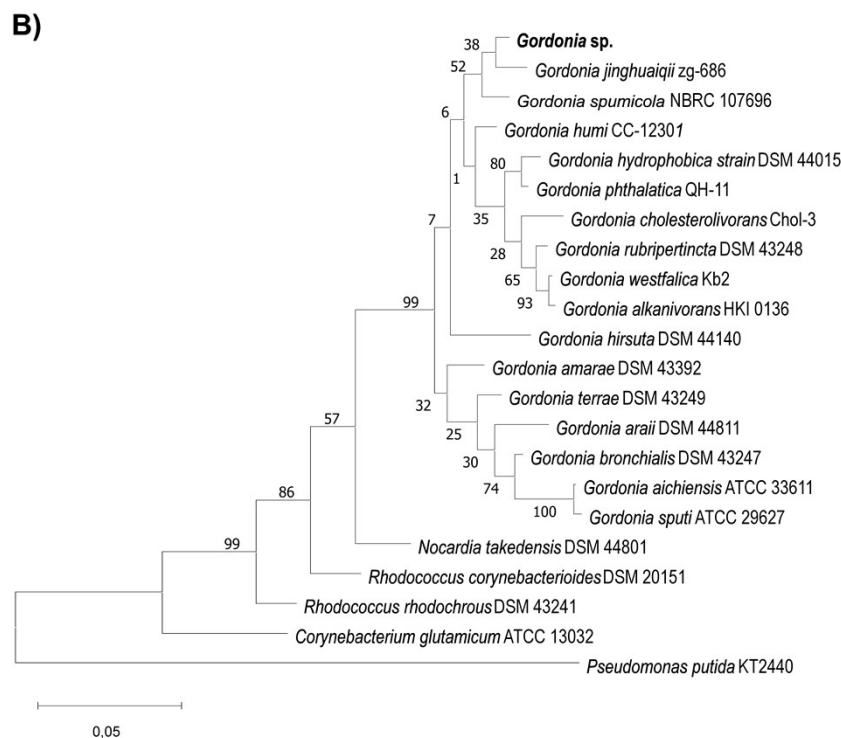

**Figure S1. Position of the novel isolates in the phylogenetic tree based on 16S rRNA, inferred by using the Maximum Likelihood method and Tamura-Nei model.<sup>1</sup> A) The tree with the highest log likelihood (-6943.31) for the *Rhodococcus* sp. isolate, source of NylC<sub>6</sub> B) The tree with the highest log likelihood (-5975.33) for *Gordonia* sp., source of NylC<sub>5</sub>. The novel strains are printed in bold. The percentage of trees in which the associated taxa clustered together are shown below the branches. The trees are drawn to scale, with branch lengths measured in the number of substitutions per site. Evolutionary analyses were conducted in MEGA11.<sup>2</sup>**

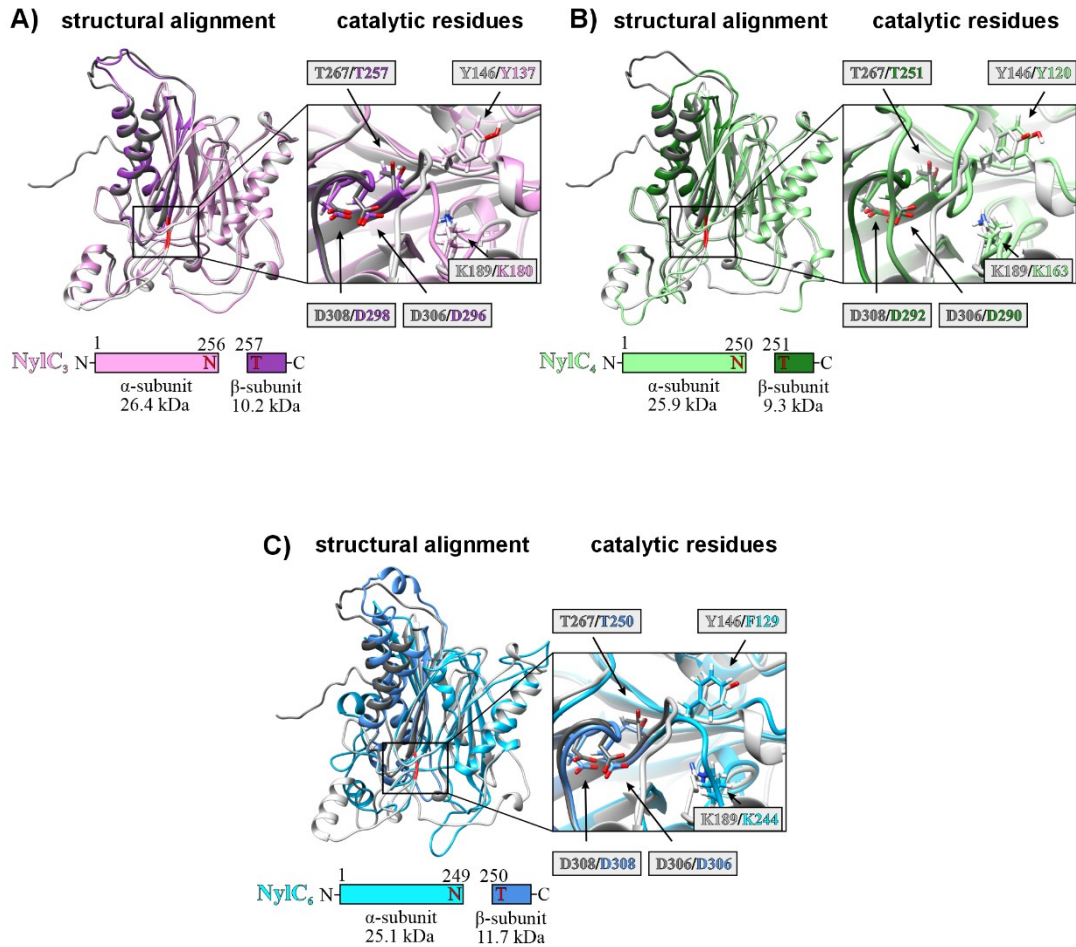

**Figure S2. Structural alignments of NylC<sub>p2</sub> and NylC<sub>3,4,6</sub>.** Protein structures of NylC<sub>1-6</sub> were predicted using ColabFold<sup>3</sup> and were aligned to NylC<sub>p2</sub>. The holistic structural alignments are shown as well as the alignments of the catalytic residues (box). The N/T-autocleavage site is highlighted in red.

**Table S2 RMSD of structural alignments of NylC<sub>p2</sub> and NylC<sub>1-6</sub>,** provided by Chimera MatchMaker

| Enzyme            | Overall (number of atom pairs) | Pruned (number of atom pairs) |
|-------------------|--------------------------------|-------------------------------|
| NylC <sub>1</sub> | 2.998 Å (353)                  | 0.525 Å (328)                 |
| NylC <sub>2</sub> | 9.723 Å (352)                  | 0.531 Å (299)                 |
| NylC <sub>3</sub> | 6.64 Å (349)                   | 0.562 Å (292)                 |
| NylC <sub>4</sub> | 11.107 Å (333)                 | 0.687 Å (260)                 |
| NylC <sub>5</sub> | 29.458 Å (337)                 | 0.93 Å (160)                  |
| NylC <sub>6</sub> | 23.941 Å (341)                 | 0.875 Å (171)                 |

## References

1. K. Tamura and M. Nei, *Mol. Biol. Evol.*, 1993, **10**, 512-526.
2. K. Tamura, G. Stecher and S. Kumar, *Mol. Biol. Evol.*, 2021, **38**, 3022-3027.
3. M. Mirdita, K. Schütze, Y. Moriwaki, L. Heo, S. Ovchinnikov and M. Steinegger, *bioRxiv*, 2021, DOI: 10.1101/2021.08.15.456425, 2021.2008.2015.456425.
